# Supplementary material for: Reptile species richness associated to ecological and historical variables in Iran
Source: PubMed Central journal article supplement (PMC7584626; doi:10.1038/s41598-020-74867-3), 2020-10-23
Supplement: 41598_2020_74867_MOESM1_ESM.pdf [file 41598_2020_74867_MOESM1_ESM.pdf]

# Reptile species richness associated to ecological and historical variables in Iran

A. Kafash, S. Ashrafi, M. Yousefi, E. Rastegar Pouyani, M. Rajabizadeh, F. Ahmadzadeh, M. Grünig, L. Pellissier

**Appendix S1.** Annotated checklist of lizards of Iran. This checklist contains 171 lizard species. Most recent checklist of lizards of Iran Safaei-Mahroo *et al.*<sup>1</sup> presented 148 species but since last published checklist some new endemic species discovered<sup>2-15</sup> and some taxonomic revisions has been made<sup>15,16</sup>. This checklist includes all recognized lizard until September, 2020. Based on our annotated checklist, Iran is home to 171 lizard species. These 171 lizard species belonged to ten families and 47 genera. Of 171 recognized lizard species in Iran 101 species (59.06 %) were diurnal, 70 species nocturnal (40.93 %) and 62 species endemic (36.25 %).

| Number | Family        | Species                           | Diurnal | Nocturnal | Endemic | Authors                                                                  |
|--------|---------------|-----------------------------------|---------|-----------|---------|--------------------------------------------------------------------------|
| 1      | Trogonophidae | <i>Diplometopon zarudnyi</i>      | *       |           |         | Nikolski, 1907                                                           |
| 2      | Agamidae      | <i>Calotes versicolor</i>         | *       |           |         | (de Filippi, 1843)                                                       |
| 3      |               | <i>Laudakia melanura</i>          | *       |           |         | (Eichwald, 1831)                                                         |
| 4      |               | <i>Laudakia nupta</i>             | *       |           |         | (Nikolski, 1896)                                                         |
| 5      |               | <i>Paralaudakia caucasia</i>      | *       |           |         | (Blanford, 1874)                                                         |
| 6      |               | <i>Paralaudakia erythrogaster</i> | *       |           |         | Nikolski, 1907                                                           |
| 7      |               | <i>Paralaudakia microlepis</i>    | *       |           |         | (de Filippi, 1843)                                                       |
| 8      |               | <i>Phrynocephalus ahvazicus</i>   | *       |           | *       | Melnikov, Melnikov, Nazarov, Rajabizadeh, Al-Johany, Amr & Ananjeva 2014 |
| 9      |               | <i>Phrynocephalus ananjevae</i>   | *       |           | *       | Melnikov, Melnikov, Nazarov, Rajabizadeh, 2013                           |
| 10     |               | <i>Phrynocephalus arabicus</i>    | *       |           |         | Anderson 1894                                                            |
| 11     |               | <i>Phrynocephalus helioscopus</i> | *       |           |         | (Pallas, 1771)                                                           |
| 12     |               | <i>Phrynocephalus horvathi</i>    | *       |           |         | Méhely, 1894                                                             |

|    |               |                                   |     |                                                                                          |
|----|---------------|-----------------------------------|-----|------------------------------------------------------------------------------------------|
| 13 |               | <i>Phrynocephalus scutellatus</i> | *   | (Olivier, 1807)                                                                          |
| 14 |               | <i>Phrynocephalus maculatus</i>   | *   | Anderson, 1872                                                                           |
| 15 |               | <i>Phrynocephalus mystaceus</i>   | *   | (Pallas, 1776)                                                                           |
| 16 |               | <i>Phrynocephalus ornatus</i>     | *   | Boulenger, 1887                                                                          |
| 17 |               | <i>Phrynocephalus persicus</i>    | *   | de Filippi, 1863                                                                         |
| 18 |               | <i>Phrynocephalus raddei</i>      | *   | Boettger 1888                                                                            |
| 19 |               | <i>Phrynocephalus lutensis</i>    | * * | Kamali and Anderson, 2015                                                                |
| 20 |               | <i>Saara asmussi</i>              | *   | (Strauch, 1863)                                                                          |
| 21 |               | <i>Saara loricata</i>             | *   | (Blanford, 1874)                                                                         |
| 22 |               | <i>Trapelus agilis</i>            | *   | (Olivier, 1804)                                                                          |
| 23 |               | <i>Trapelus persicus</i>          | *   | (Blanford, 1881)                                                                         |
| 24 |               | <i>Trapelus ruderatus</i>         | *   | (Olivier, 1804)                                                                          |
| 25 |               | <i>Trapelus sanguinolentus</i>    | *   | (Pallas, 1814)                                                                           |
| 26 |               | <i>Uromastyx aegyptia</i>         | *   | (Forsk. 1775)                                                                            |
| 27 | Anguidae      | <i>Anguis colchica</i>            | *   | (Nordmann, 1840)                                                                         |
| 28 |               | <i>Pseudopus apodus</i>           | *   | (Pallas, 1775)                                                                           |
| 29 | Eublepharidae | <i>Eublepharis turcmenicus</i>    | *   | Darevsky, 1977                                                                           |
| 30 |               | <i>Eublepharis macularius</i>     | *   | (Blyth, 1854)                                                                            |
| 31 |               | <i>Eublepharis angramainyu</i>    | *   | Anderson & Leviton, 1966                                                                 |
| 32 | Gekkonidae    | <i>Agamura persica</i>            | *   | (Duméril, 1856)                                                                          |
| 33 |               | <i>Agamura cruralis</i>           | *   | Blanford, 1874                                                                           |
| 34 |               | <i>Agamura kermanensis</i>        | * * | Hosseiian Yousefkhani, Aliabadin, Rastegar-Pouyani, Daevish, Shafiei, Sehhatasabet, 2018 |
| 35 |               | <i>Bunopus tuberculatus</i>       | *   | Blanford, 1874                                                                           |
| 36 |               | <i>Bunopus crassicauda</i>        | * * | Nikolsky, 1907                                                                           |
| 37 |               | <i>Crossobamon eversmanni</i>     | *   | (Wiegmann, 1834)                                                                         |
| 38 |               | <i>Cyrtopodion agamuroides</i>    | *   | (Nikolsky, 1900)                                                                         |
| 39 |               | <i>Cyrtopodion brevipes</i>       | *   | (Blanford, 1874)                                                                         |
| 40 |               | <i>Cyrtopodion gastrophole</i>    | * * | (Werner, 1917)                                                                           |

|    |                                         |     |                                                                     |
|----|-----------------------------------------|-----|---------------------------------------------------------------------|
| 41 | <i>Cyrtopodion golubevi</i>             | * * | Nazarov, Ananjeva & Rajabizadeh, 2009                               |
| 42 | <i>Cyrtopodion hormozganum</i>          | * * | Nazarov, Bondarenko & Rajabizadeh, 2012                             |
| 43 | <i>Cyrtopodion kachhensis</i>           | *   | (Stoliczka, 1872)                                                   |
| 44 | <i>Cyrtopodion kiabii</i>               | * * | Ahmadzadeh, Flecks, Torki Bohme, 2011                               |
| 45 | <i>Cyrtopodion kirmanense</i>           | * * | (Nikolsky, 1900)                                                    |
| 46 | <i>Cyrtopodion persepolense</i>         | * * | Nazarov, Ananjeva & Rajabizadeh, 2009                               |
| 47 | <i>Cyrtopodion scabrum</i>              | *   | (Heyden, 1827)                                                      |
| 48 | <i>Cyrtopodion sistanensis</i>          | * * | Nazarov & Rajabizadeh, 2007                                         |
| 49 | <i>Hemidactylus flaviviridis</i>        | *   | Rüppell, 1835                                                       |
| 50 | <i>Hemidactylus persicus</i>            | *   | Anderson, 1872                                                      |
| 51 | <i>Hemidactylus robustus</i>            | *   | Heyden, 1827                                                        |
| 52 | <i>Hemidactylus romeshkanicus</i>       | * * | Torki, 2011                                                         |
| 53 | <i>Hemidactylus achaemenidicus</i>      | * * | Torki, 2020                                                         |
| 54 | <i>Hemidactylus pseudoromeshkanicus</i> | * * | Torki, 2020                                                         |
| 55 | <i>Hemidactylus sassanidianus</i>       | * * | Torki, 2020                                                         |
| 56 | <i>Mediodactylus aspratilis</i>         | * * | (Anderson, 1973)                                                    |
| 57 | <i>Mediodactylus heterocercum</i>       | *   | (Blanford, 1874)                                                    |
| 58 | <i>Mediodactylus heteropholis</i>       | *   | (Minton, Anderson, Anderson, 1970)                                  |
| 59 | <i>Mediodactylus ilamensis</i>          | * * | (Fathinia, Karamiani, Darvishnia, Heidari & Rastegar-Pouyani, 2011) |
| 60 | <i>Mediodactylus russowii</i>           | *   | (Strauch, 1887)                                                     |
| 61 | <i>Mediodactylus sagittiferum</i>       | * * | (Nikolsky, 1900)                                                    |
| 62 | <i>Mediodactylus spinicauda</i>         | *   | (Strauch, 1887)                                                     |
| 63 | <i>Mediodactylus stevenandersoni</i>    | * * | (Torki, 2011)                                                       |
| 64 | <i>Microgecko helenae</i>               | *   | Nikolsky, 1907                                                      |
| 65 | <i>Microgecko latifi</i>                | * * | (Leviton & Anderson, 1972)                                          |

|    |            |                                         |     |                                                                                       |
|----|------------|-----------------------------------------|-----|---------------------------------------------------------------------------------------|
| 66 |            | <i>Microgecko persicus</i>              | *   | (Nikolsky, 1903)                                                                      |
| 67 |            | <i>Microgecko varaviensis</i>           | * * | Gholamifard, Rastegar-Pouyani & Rastegar-Pouyani, 2019                                |
| 68 |            | <i>Pseudoceramodactylus khobarensis</i> | *   | Haas, 1957                                                                            |
| 69 |            | <i>Rhinogecko misonnei</i>              | *   | de Witte, 1973                                                                        |
| 70 |            | <i>Stenodactylus affinis</i>            | *   | (Murray, 1884)                                                                        |
| 71 |            | <i>Trigonodactylus arabicus</i>         | *   | (Haas, 1957)                                                                          |
| 72 |            | <i>Stenodactylus doriae</i>             | *   | (Blanford, 1874)                                                                      |
| 73 |            | <i>Tenuidactylus caspium</i>            | *   | (Eichwald, 1831)                                                                      |
| 74 |            | <i>Tenuidactylus longipes</i>           | *   | (Nikolsky, 1896)                                                                      |
| 75 |            | <i>Tenuidactylus turcmenicus</i>        | *   | (Szczerbak, 1978)                                                                     |
| 76 |            | <i>Tropiocolotes naybandensis</i>       | * * | Krause, Ahmadzadeh, Moazeni, Wagner & Wilms 2013                                      |
| 77 |            | <i>Tropiocolotes hormozganensis</i>     | * * | Rajabizadeh, Faizi, Anderson, Zarrintab & Nazarov 2018                                |
| 78 |            | <i>Microgecko chabaharensis</i>         | * * | Gholamifard, Rastegar-Pouyani, Rastegar-Pouyani, Khosravani, Yousefkhani & Oraei 2015 |
| 79 |            | <i>Parsigecko ziaiei</i>                | * * | Safaei- Mahroo, Ghaffari & Anderson 2016                                              |
| 80 |            | <i>Trigonodactylus persicus</i>         | * * | Nazarov, Melnikov, Rajabizadeh and Poyarkov, 2018                                     |
| 81 |            | <i>Lakigecko aaronbaueri</i>            | * * | Torki, 2020                                                                           |
| 82 |            | <i>Microgecko laki</i>                  | * * | Torki, 2020                                                                           |
| 83 | Lacertidae | <i>Acanthodactylus blanfordii</i>       | *   | Boulenger, 1918                                                                       |
| 84 |            | <i>Acanthodactylus boskianus</i>        | *   | (Daudin , 1802)                                                                       |
| 85 |            | <i>Acanthodactylus cantoris</i>         | *   | Gnther, 1864                                                                          |
| 86 |            | <i>Acanthodactylus grandis</i>          | *   | Boulenger, 1909                                                                       |
| 87 |            | <i>Acanthodactylus khamirensis</i>      | * * | Heidari, Rastegar-Pouyani, Rastegar-Pouyani & Rajabizadeh 2013                        |
| 88 |            | <i>Acanthodactylus micropholis</i>      | *   | Blanford, 1874                                                                        |
| 89 |            | <i>Acanthodactylus nilsoni</i>          | * * | Rastegar-Pouyani, 1998                                                                |

|     |                                  |   |   |                                                                                      |
|-----|----------------------------------|---|---|--------------------------------------------------------------------------------------|
| 90  | <i>Acanthodactylus schmidtii</i> | * |   | Haas, 1957                                                                           |
| 91  | <i>Apathya cappadocica</i>       | * |   | (Werner, 1902)                                                                       |
| 92  | <i>Apathya yassujica</i>         | * | * | (Nilson, Rastegar-Pouyani,<br>Rastegar-Pouyani & Andern 2003)                        |
| 93  | <i>Darevskia caspica</i>         | * | * | Ahmadzadeh, Flecks, Carretero,<br>Mozaffari, Bohme, Harris, Freitas<br>& Rodder 2013 |
| 94  | <i>Darevskia chlorogaster</i>    | * |   | (Boulenger, 1908)                                                                    |
| 95  | <i>Darevskia defilippii</i>      | * | * | (Camerano, 1877)                                                                     |
| 96  | <i>Darevskia kamii</i>           | * | * | Ahmadzadeh, Flecks, Carretero,<br>Mozaffari, Bohme, Harris, Freitas<br>& Rodder 2013 |
| 97  | <i>Darevskia kopetdaghica</i>    | * |   | Ahmadzadeh, Flecks, Carretero,<br>Mozaffari, Bohme, Harris, Freitas<br>& Rodder 2013 |
| 98  | <i>Darevskia praticola</i>       | * |   | (Eversmann, 1834)                                                                    |
| 99  | <i>Darevskia raddei</i>          | * |   | (Boettger, 1892)                                                                     |
| 100 | <i>Darevskia schaeckeli</i>      | * | * | Ahmadzadeh, Flecks, Carretero,<br>Mozaffari, Bohme, Harris, Freitas<br>& Rodder 2013 |
| 101 | <i>Darevskia steineri</i>        | * | * | (Eiselt, 1995)                                                                       |
| 102 | <i>Darevskia valentini</i>       | * |   | (Boettger, 1892)                                                                     |
| 103 | <i>Eremias acutirostris</i>      | * |   | (Boulenger, 1887)                                                                    |
| 104 | <i>Eremias andersoni</i>         | * | * | Darevsky & Szczerbak, 1978                                                           |
| 105 | <i>Eremias arguta</i>            | * |   | (Pallas, 1773)                                                                       |
| 106 | <i>Eremias fasciata</i>          | * |   | Blanford, 1874                                                                       |
| 107 | <i>Eremias grammica</i>          | * |   | (Lichtenstein, 1823)                                                                 |
| 108 | <i>Eremias intermedia</i>        | * |   | (Strauch, 1876)                                                                      |
| 109 | <i>Eremias isfahanica</i>        | * | * | Rastegar-Pouyani, Hosseinian,<br>Rafiee, Kami, Rajabizadeh &<br>Wink 2016            |
| 110 | <i>Eremias kavirensis</i>        | * | * | Mozaffari & Parham 2007                                                              |
| 111 | <i>Eremias kopetdaghica</i>      | * |   | Szczerbak, 1972                                                                      |

|     |                  |                               |   |   |                                                         |
|-----|------------------|-------------------------------|---|---|---------------------------------------------------------|
| 112 |                  | <i>Eremias lalezharica</i>    | * | * | Moravec, 1994                                           |
| 113 |                  | <i>Eremias lineolata</i>      | * |   | (Nikolsky, 1896)                                        |
| 114 |                  | <i>Eremias montana</i>        | * | * | Rastegar-Pouyani & Rastegar-Pouyani 2001                |
| 115 |                  | <i>Eremias nigrocellata</i>   | * |   | Nikolsky, 1896                                          |
| 116 |                  | <i>Eremias papenfussi</i>     | * | * | Mozaffari, Ahmadzadeh & Parham, 2011                    |
| 117 |                  | <i>Eremias persica</i>        | * |   | Blanford, 1874                                          |
| 118 |                  | <i>Eremias pleskei</i>        | * |   | Bedriaga, 1905                                          |
| 119 |                  | <i>Eremias strauchi</i>       | * |   | Kessler, 1878                                           |
| 120 |                  | <i>Eremias suphani</i>        | * |   | Basoglu & Hellmich, 1968                                |
| 121 |                  | <i>Eremias fahimii</i>        | * | * | Mozaffari, Ahmadzadeh, Saberi-Pirooz, 2020              |
| 122 |                  | <i>Eremias velox</i>          | * |   | (Pallas, 1771)                                          |
| 123 |                  | <i>Iranolacerta brandtii</i>  | * |   | (de Filippi, 1863)                                      |
| 124 |                  | <i>Iranolacerta zagrosica</i> | * | * | (Rastegar-Pouyani & Nikson 1998)                        |
| 125 |                  | <i>Lacerta media</i>          | * |   | Lantz & Cyrén, 1920                                     |
| 126 |                  | <i>Lacerta strigata</i>       | * |   | Eichwald, 1831                                          |
| 127 |                  | <i>Mesalina brevirostris</i>  | * |   | Blanford, 1874                                          |
| 128 |                  | <i>Mesalina watsonana</i>     | * |   | (Stoliczka, 1872)                                       |
| 129 |                  | <i>Ophisops elegans</i>       | * |   | Ménétriés, 1832                                         |
| 130 |                  | <i>Timon kurdistanicus</i>    | * |   | Blanford, 1874                                          |
| 131 |                  | <i>Timon princeps</i>         | * | * | (Blanford, 1874)                                        |
| 132 | Phyllodactylidae | <i>Asaccus andersoni</i>      | * | * | Torki, Fathinia, Rostami, Gharzi & Nazari-Serenjeh 2011 |
| 133 |                  | <i>Asaccus elisae</i>         | * |   | (Werner, 1895)                                          |
| 134 |                  | <i>Asaccus granularis</i>     | * | * | Torki, 2010                                             |
| 135 |                  | <i>Asaccus griseonotus</i>    | * |   | Dixon & Anderson, 1973                                  |
| 136 |                  | <i>Asaccus iranicus</i>       | * | * | Torki, Ahmadzadeh, Igaz, Avci & Kumlutas 2011           |

|     |           |                                 |   |   |                                                                                                     |
|-----|-----------|---------------------------------|---|---|-----------------------------------------------------------------------------------------------------|
| 137 |           | <i>Asaccus kermanshahensis</i>  | * | * | Rastegar-Pouyani, 1996                                                                              |
| 138 |           | <i>Asaccus kurdistanensis</i>   | * | * | Rastegar-Pouyani, Nikson & Faizi<br>2006                                                            |
| 139 |           | <i>Asaccus nasrullahi</i>       | * | * | Werner, 2006                                                                                        |
| 140 |           | <i>Asaccus tangestanensis</i>   | * | * | Torki, Ahmadzadeh, Igaz, Avci &<br>Kumlutas 2011                                                    |
| 141 |           | <i>Asaccus zagrosicus</i>       | * | * | Torki, Ahmadzadeh, Igaz, Avci &<br>Kumlutas 2011                                                    |
| 142 | Scincidae | <i>Ablepharus bivittatus</i>    | * |   | (Ménétriés, 1832)                                                                                   |
| 143 |           | <i>Ablepharus chernovi</i>      | * |   | Darevsky, 1953                                                                                      |
| 144 |           | <i>Ablepharus pannonicus</i>    | * |   | (Fitzinger, 1824)                                                                                   |
| 145 |           | <i>Ablepharus grayanus</i>      | * |   | (Stoliczka 1872)                                                                                    |
| 146 |           | <i>Heremites auratus</i>        | * |   | (Linnaeus, 1758)                                                                                    |
| 147 |           | <i>Heremites vittata</i>        | * |   | (Olivier, 1804)                                                                                     |
| 148 |           | <i>Heremites septemtaeniata</i> | * |   | (Reuss, 1834)                                                                                       |
| 149 |           | <i>Chalcides ocellatus</i>      | * |   | (Forsk. 1775)                                                                                       |
| 150 |           | <i>Eumeces schneideri</i>       | * |   | (Daudin, 1802)                                                                                      |
| 151 |           | <i>Eumeces persicus</i>         | * | * | Faizi, Rastegar-Pouyani,<br>Rastegar-Pouyani, Nazarov,<br>Heidari, Zangi, Orlova &<br>Poyarkov 2017 |
| 152 |           | <i>Eumeces blythianus</i>       | * |   | (Anderson 1871)                                                                                     |
| 153 |           | <i>Eurylepis taeniolatus</i>    | * |   | Blyth, 1854                                                                                         |
| 154 |           | <i>Ophiomorus blanfordi</i>     | * |   | Boulenger, 1887                                                                                     |
| 155 |           | <i>Ophiomorus brevipes</i>      | * |   | (Blanford, 1874)                                                                                    |
| 156 |           | <i>Ophiomorus maranjabensis</i> | * | * | Kazemi, Farhadi Qomi, Kami &<br>Anderson, 2011                                                      |
| 157 |           | <i>Ophiomorus nuchalis</i>      | * | * | Nilson & Andrén, 1978                                                                               |
| 158 |           | <i>Ophiomorus persicus</i>      | * | * | (Steindachner, 1867)                                                                                |
| 159 |           | <i>Ophiomorus streeti</i>       | * | * | Anderson & Leviton, 1966                                                                            |
| 160 |           | <i>Ophiomorus tridactylus</i>   | * |   | (Blyth, 1853)                                                                                       |
| 161 |           | <i>Scincus mitranus</i>         | * |   | Anderson, 1871                                                                                      |

|     |                   |                                 |     |                                                                            |
|-----|-------------------|---------------------------------|-----|----------------------------------------------------------------------------|
| 162 |                   | <i>Scincus scincus</i>          | *   | (Linnaeus, 1758)                                                           |
| 163 | Sphaerodactylidae | <i>Pristurus rupestris</i>      | *   | Blanford, 1874                                                             |
| 164 |                   | <i>Teratoscincus bedriagai</i>  | *   | Nikolsky, 1899                                                             |
| 165 |                   | <i>Teratoscincus scincus</i>    | *   | (Schlegel, 1858)                                                           |
| 166 |                   | <i>Teratoscincus microlepis</i> | *   | Nikolsky, 1899                                                             |
| 167 |                   | <i>Teratoscincus sistanense</i> | * * | Akbarpour, Shafiei, Sehhatiasabet & Damadi 2017                            |
| 168 |                   | <i>Teratoscincus mesriensis</i> | * * | Nazarov, Rajabizadeh, Poyarkov, Ananjeva, Melnikov & Rastegar-Pouyani 2017 |
| 169 | Varanidae         | <i>Varanus bengalensis</i>      | *   | (Daudin, 1802)                                                             |
| 170 |                   | <i>Varanus griseus</i>          | *   | (Daudin, 1803)                                                             |
| 171 |                   | <i>Varanus nesterovi</i>        | * * | Bohme, Ehrlich, Milto, Orlov & Scholz 2015                                 |



References Appendix S1.

1. Safaei-Mahroo, B. et al. The herpetofauna of Iran: checklist of taxonomy, distribution and conservation status. *Asian Herpetol. Res.* **6**, 257–290 (2015).
2. Akbarpour, M. et al. A new species of frog-eyed gecko, genus *Teratoscincus* Strauch, 1863 (Squamata: Sphaerodactylidae), from southeastern Iran. *Zool. Middle East.* **63**, 296-302 (2017).
3. Faizi, H. et al. A new species of *Eumeces* Wiegmann 1834 (Sauria: Scincidae) from Iran. *Zootaxa* **4320**, 289-304 (2017).
4. Gholamifard, A., Rastegar-Pouyani, N. & Rastegar-Pouyani, E. A new species of the genus *Microgecko* Nikolsky, 1907 (Sauria: Gekkonidae) from the southern Zagros Mountains, Iran. *Zootaxa* **4648**: 435–454 (2019).
5. Gholamifard, A. et al. A new species of the genus *Microgecko* Nikolsky, 1907 (Sauria: Gekkonidae) from southern Iran. *Zootaxa* **4093**: 026–040 (2016).
6. Hosseinian Yousefkhani et al. Description of a new species of the genus *Agamura* Blanford, 1874 (Squamata: Gekkonidae) from southern Iran. *Zootaxa* **4457**, 325–331 (2018).
7. Kamali, A. & Anderson S.C. A new Iranian *Phrynocephalus* (Reptilia: Squamata: Agamidae) from the hottest place on earth and a key to the genus *Phrynocephalus* in southwestern Asia and Arabia. *Zootaxa* **3904**, 249-260 (2015).
8. Mozaffari, O., Ahmadzadeh, F., Saberi-Pirooz R. Fahimi's racerunner, a new species of the genus *Eremias* Fitzinger, 1834 (Sauria: Lacertidae) from Iran. *Zootaxa* **4768**, 565-578 (2020).
9. Nazarov, R.A., Radjabizadeh, M., Poyarkov, Jr., N.A., Ananjeva, N.B., Melnikov, D.A., Rastegar Pouyani, E. 2017. A new species of Frog-eyed gecko, Genus *Teratoscincus* Strauch, 1863 (Squamata: Sauria: Sphaerodactylidae), from Central Iran. *Russ. J. Herpetol.* **24**, 291-310.
10. Rastegar-Pouyani, E. et al. A new species of the genus *Eremias* Fitzinger, 1834 (Squamata: Lacertidae) from Central Iran, supported by mtDNA sequences and morphology. *Zootaxa* **4132**, 207-220 (2016).
11. Safaei-Mahroo, B. et al. A new genus and species of gekkonid lizard (Squamata: Gekkota: Gekkonidae) from Hormozgan Province with a revised key to gekkonid genera of Iran. *Zootaxa* **4109**, 428–444 (2016).
12. Torki F. A new gecko genus from Zagros Mountains, Iran. *Amphib. reptile conserv* **14**, 55–62 (2020).

13. Toriki F. Three new species of *Hemidactylus* Oken, 1817 (Squamata, Gekkonidae) from Iran. *Amphib. reptile conserv* **13**, 239–258 (2019).
14. Toriki, F. A new species of dwarf gecko of the genus *Microgecko* (Squamata: Gekkonidae) from Iran. *Sauria* **42**, 41-54 (2020).
15. Hosseinian Yousefkhani, SS., Aliabadian, M., Rastegar-Pouyani, E. & Darvish. J. Taxonomic revision of the spider geckos of the genus *Agamura* sensu lato Blanford, 1874 (Sauria: Gekkonidae) in the Iranian Plateau. *Herpetol. J.* **29**: 1-12 (2019).
16. Rajabizadeh, M., Faizi, H., Anderson, S.C., Zarrintab, M. & Nazarov, R. Taxonomic status of *Tropicolotes* cf. *steudneri* with a description of a new species of *Tropicolotes* (Reptilia: Squamata: Gekkonidae) in southern Iran. *Zootaxa* **4388**, 283- 291 (2018).

Appendix S2 (Figures S1-S36). Examples habitats surveyed during fieldworks and observed lizard species in each habitat. Photos by Masoud Yousefi.

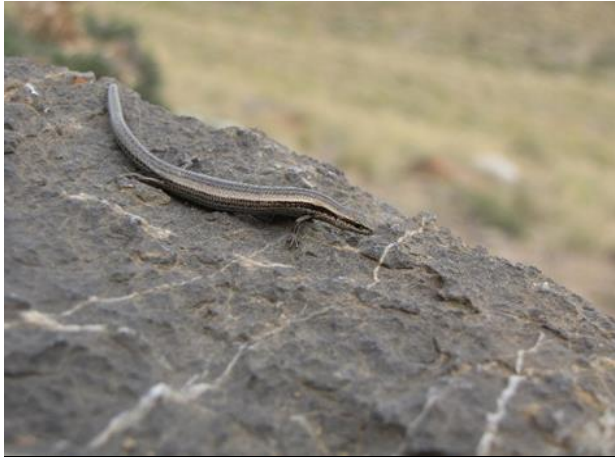

Figure S1. *Ablepharus pannonicus*.

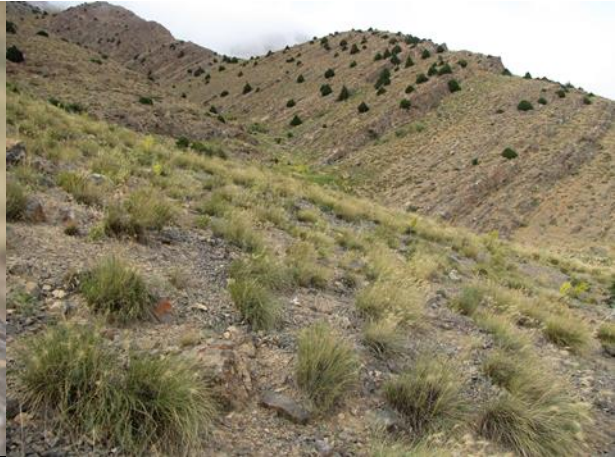

Figure S2. Habitat of *Ablepharus pannonicus*, Tehran province.

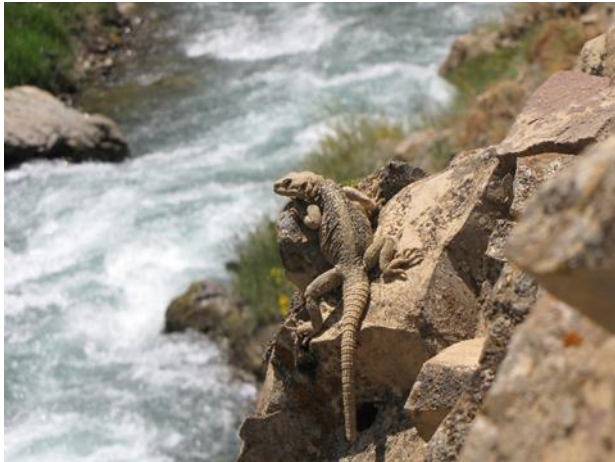

Figure S3. *Paralaudakia caucasica*.

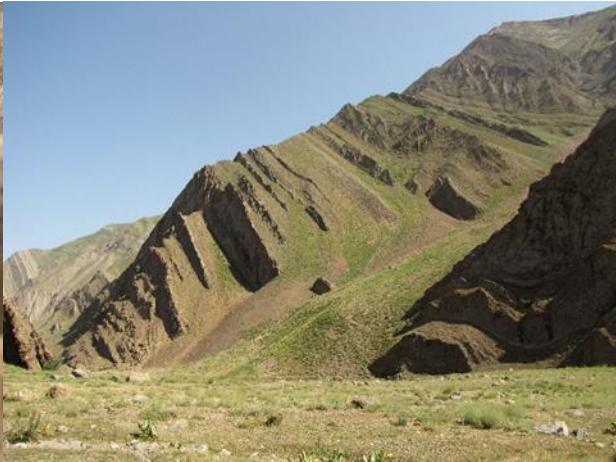

Figure S4. Habitat of *Paralaudakia caucasica*, Elburz province.

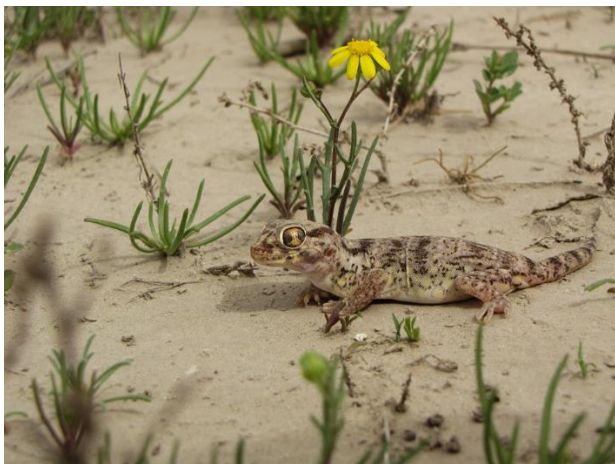

Figure S5. *Stenodactylus affinis*.

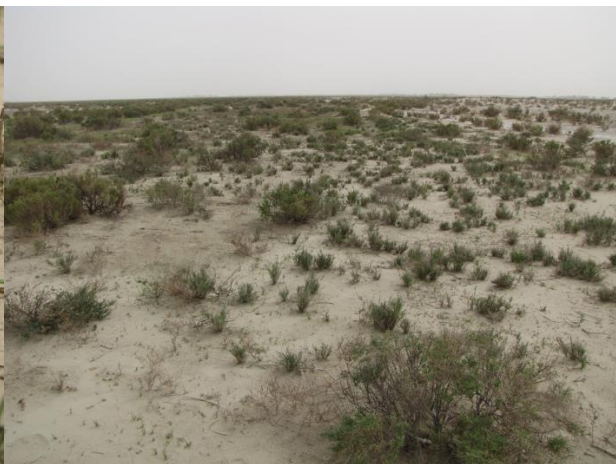

Figure S6. Habitat of *Stenodactylus affinis*, Hurmozgan province.

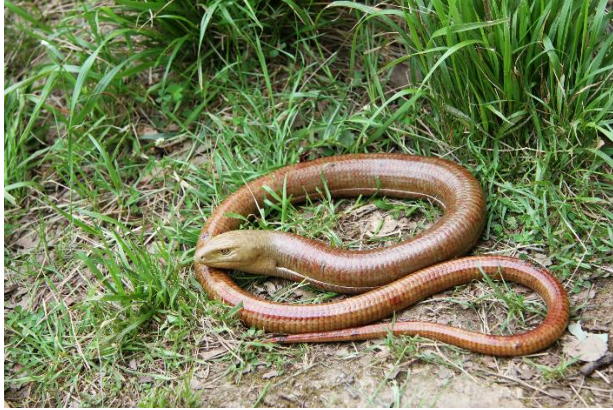

Figure S7. *Pseudopus apodus*.

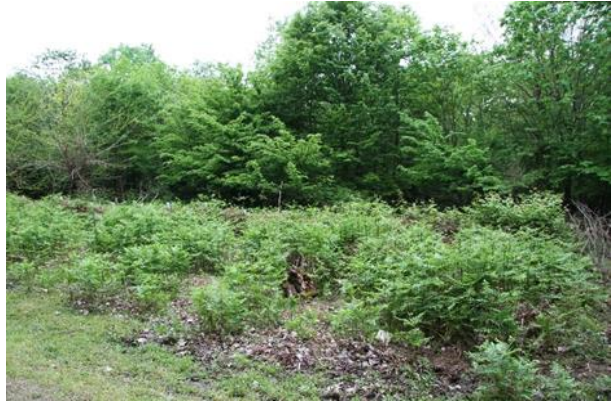

Figure S8. Habitat of *Pseudopus apodus*, Mazandaran province.

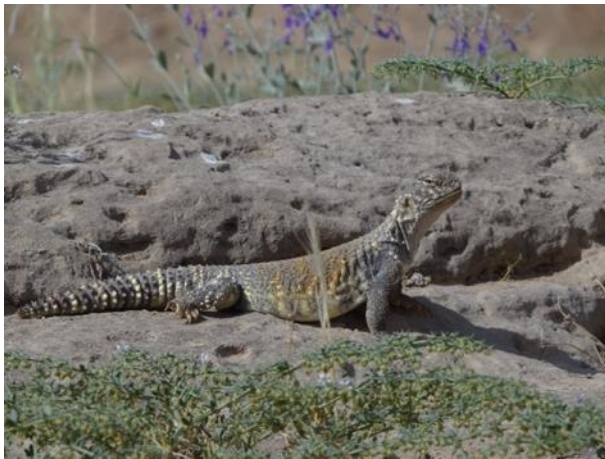

Figure S9. *Saara loricata*.

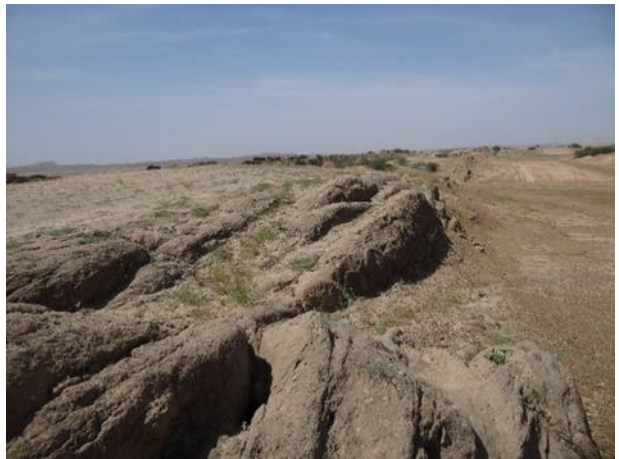

Figure S10. Habitat of *Saara loricata*, Khuzestan province.

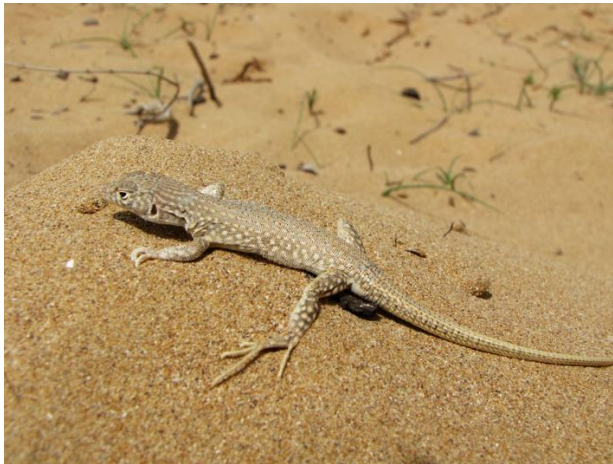

Figure S11. *Acanthodactylus khamirensis*.

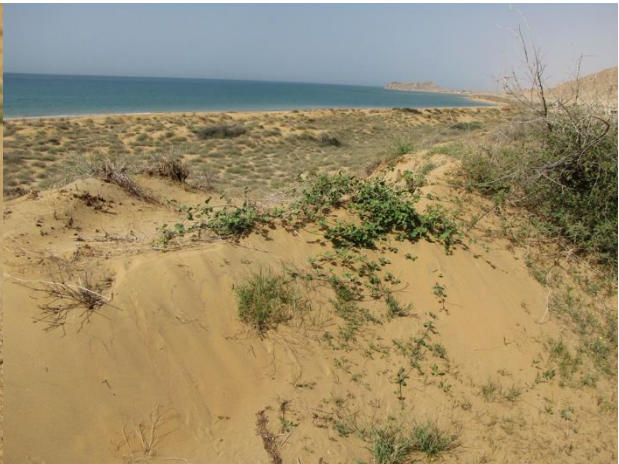

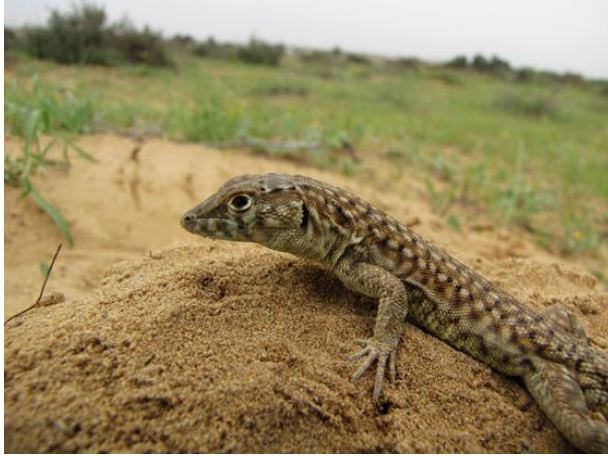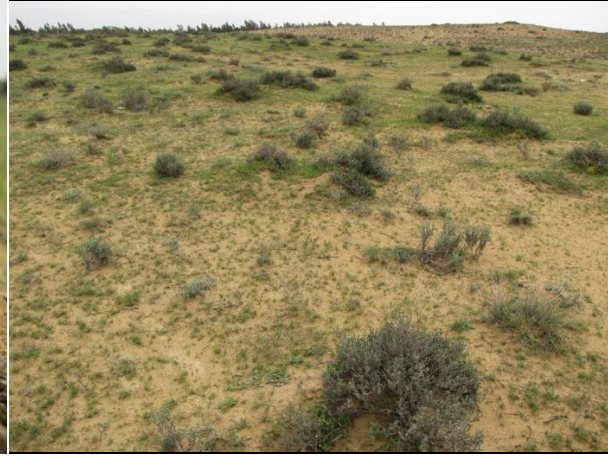

Figure S13. *Acanthodactylus grandis*. Figure S14. Habitat of *Acanthodactylus grandis*, Bushehr province.

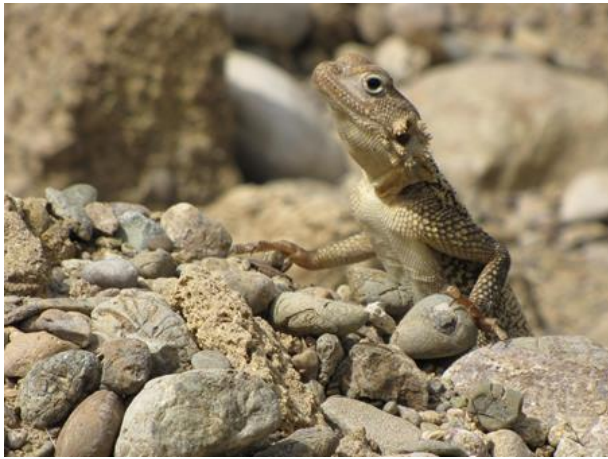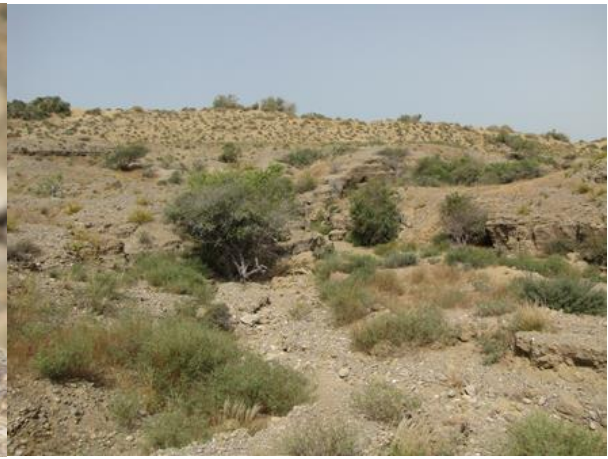

Figure S15. *Laudakia nupta*. Figure S16. Habitat of *Laudakia nupta*, Sistan and Baluchestan province.

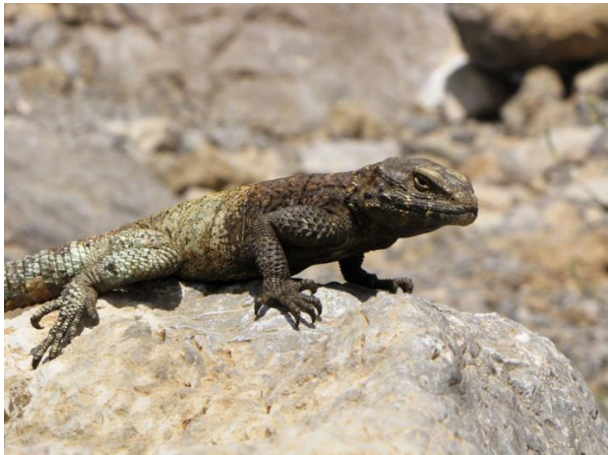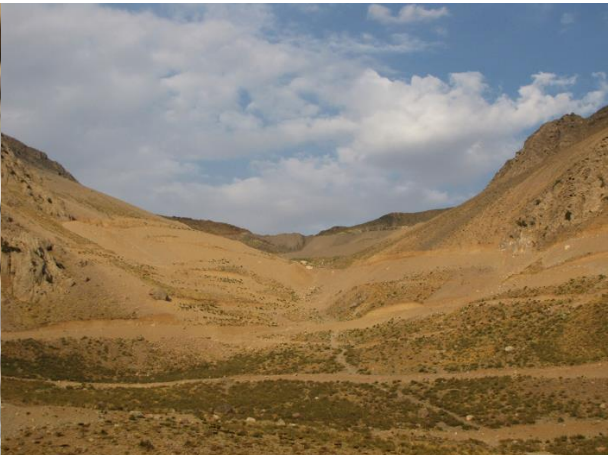

Figure S17. *Paralaudakia microlepis*. Figure S18. Habitat of *Paralaudakia microlepis*, Kohgiluyeh and Boyer-Ahmad province.

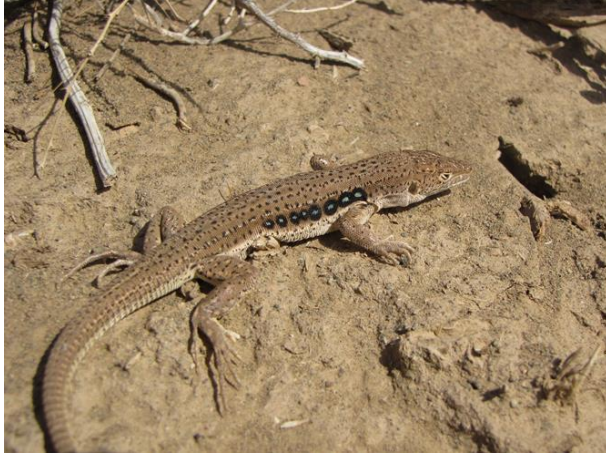

Figure S19. *Eremias velox*.

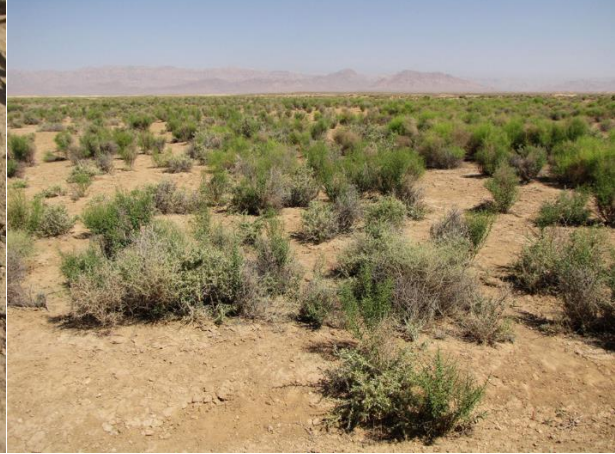

Figure S20. Habitat of *Eremias velox*, Semnan province.

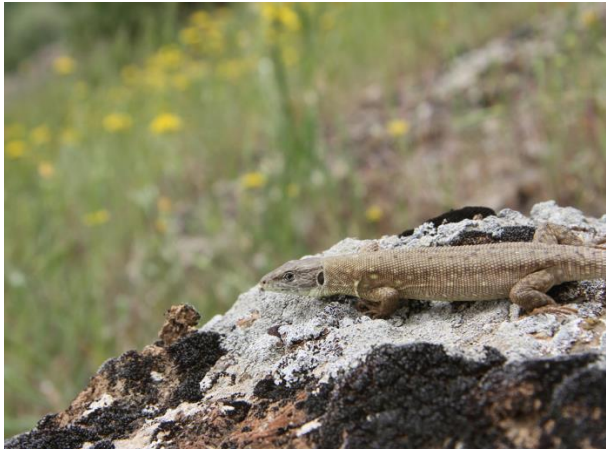

Figure S21. *Timon kurdistanicus*.

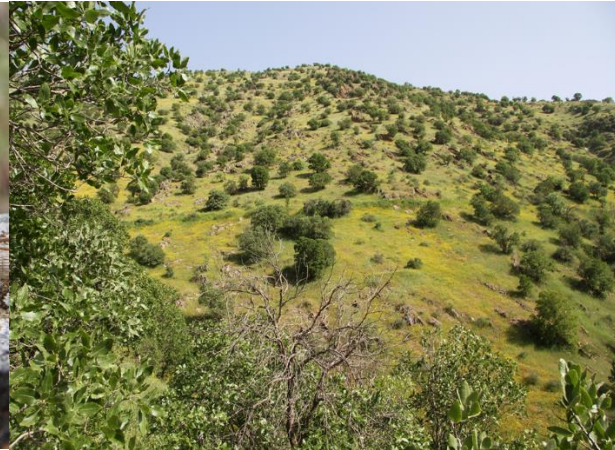

Figure S22. Habitat of *Timon kurdistanicus*, Kurdistan province.

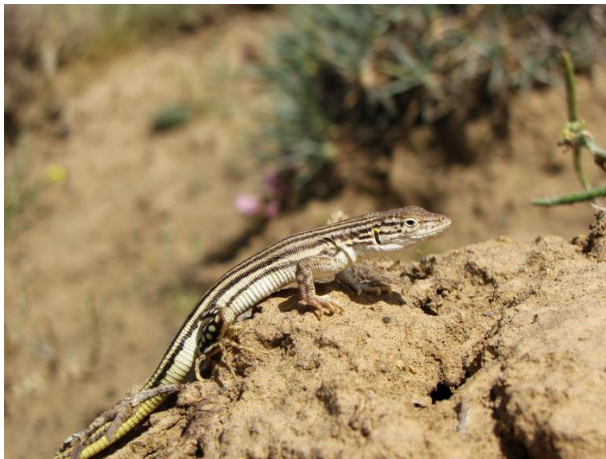

Figure S23. *Eremias fasciata*.

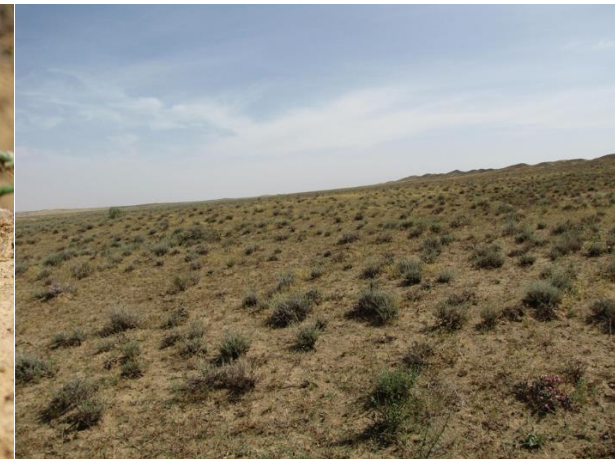

Figure S24. Habitat of *Eremias fasciata*, Elburz province.

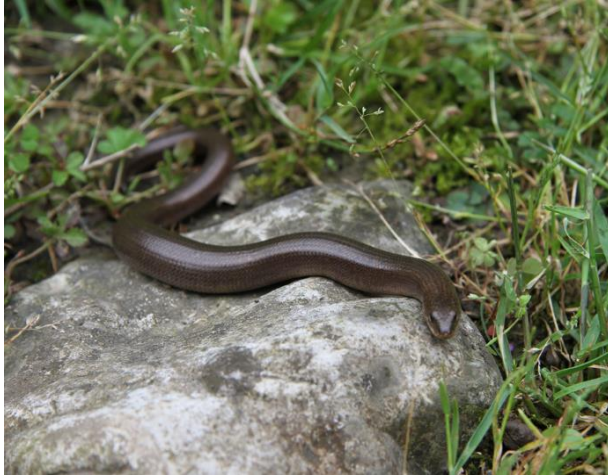

Figure S25. *Anguis colchica*.

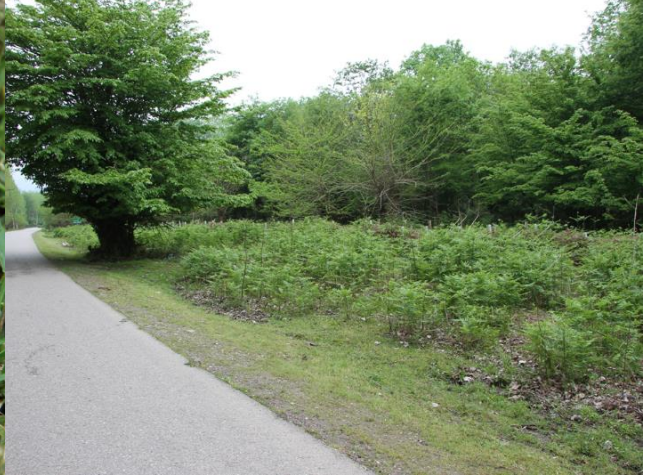

Figure S26. Habitat of *Anguis colchica*, Mazandaran province.

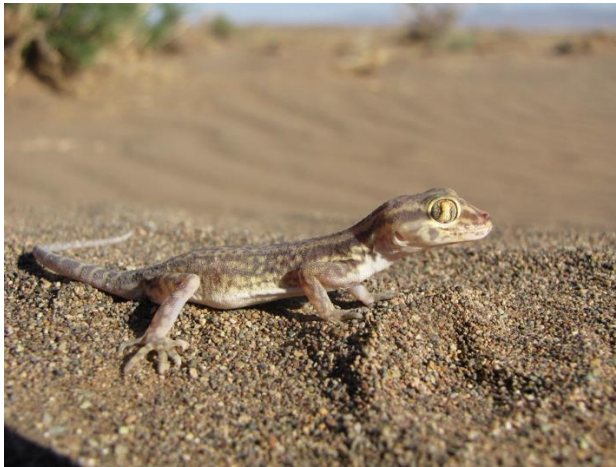

Figure S27. *Crossobamon eversmanni*.

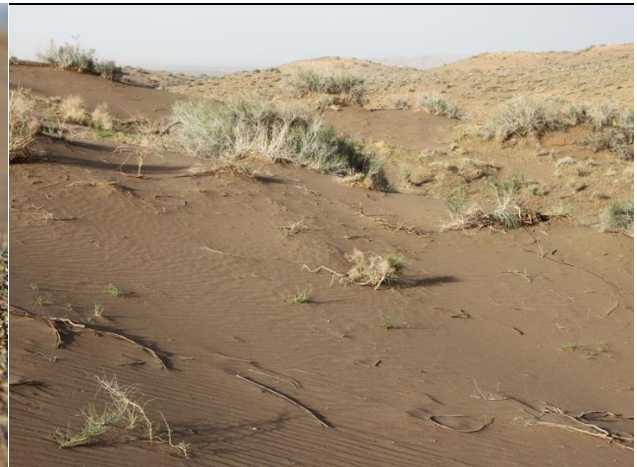

Figure S28. Habitat of *Crossobamon eversmanni*, Khorasan-e-Razavi province.

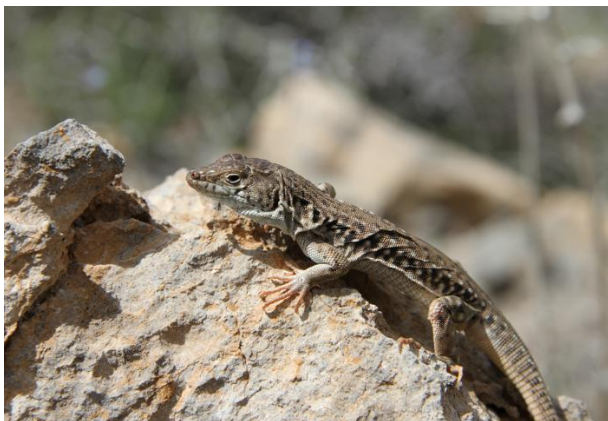

Figure S29. *Eremias isfahanica*.

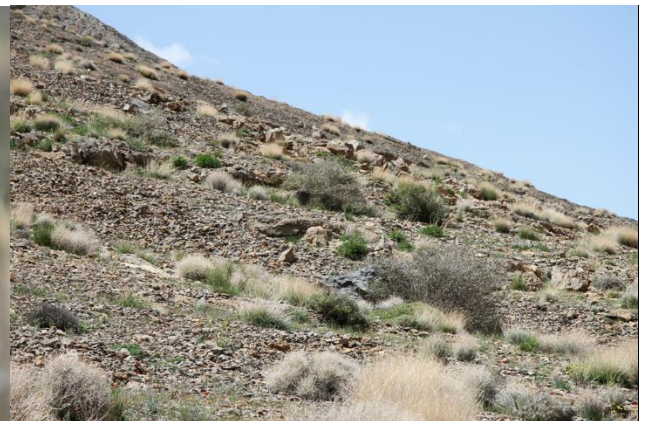

Figure S30. Habitat of *Eremias isfahanica*, Isfahan province.

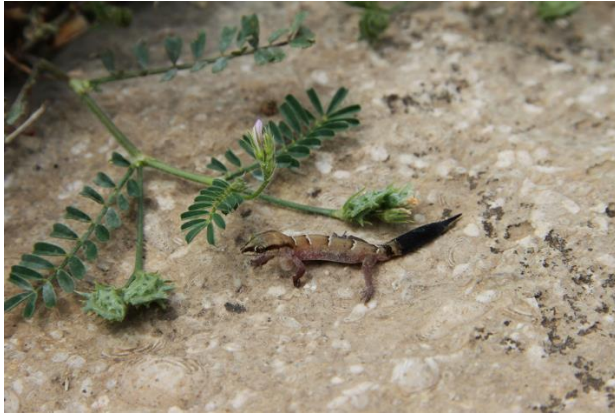

Figure S31. *Microgecko helenae*.

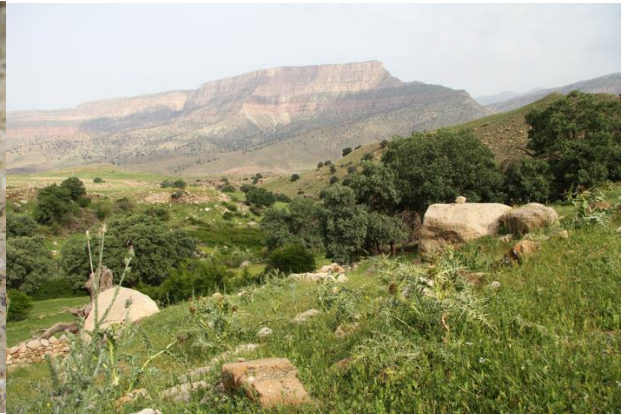

Figure S32. Habitat of *Microgecko helenae*, Luristan province.

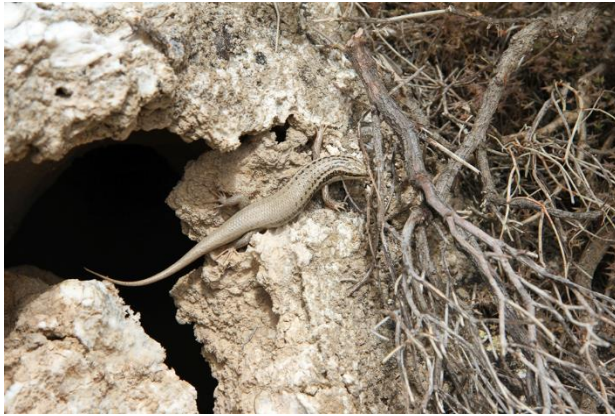

Figure S33. *Heremites septemtaeniata*.

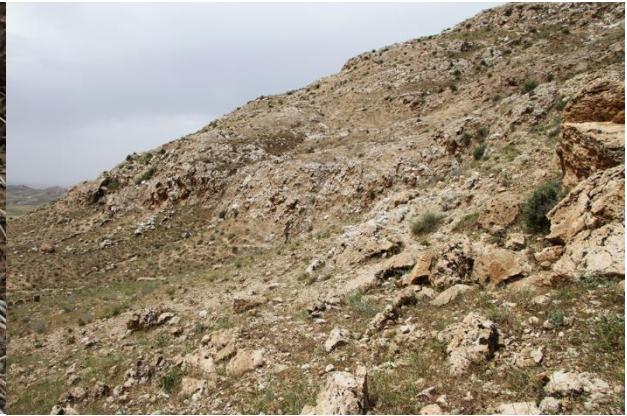

Figure S34. Habitat of *Heremites septemtaeniata*, Ilam province.

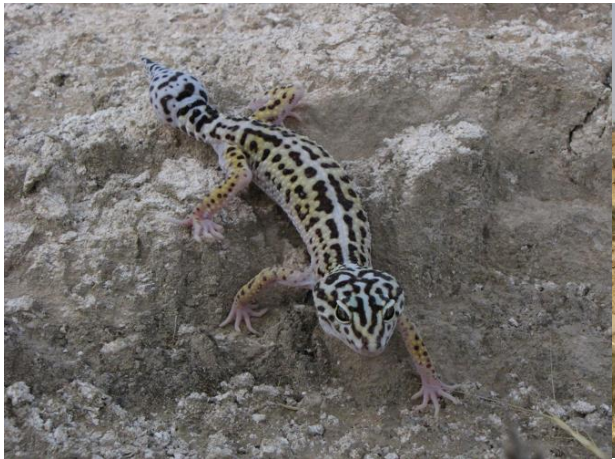

Figure S35. *Eublepharis angramainyu*.

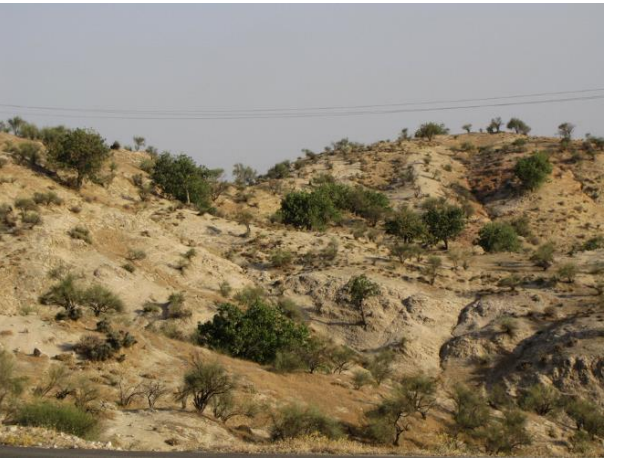

Figure S36. Habitat of *Eublepharis angramainyu*, Fars province.



### Appendix S3. Papers and books examined in this study.

- Akbarpour, M. *et al.* A new species of frog-eyed gecko, genus *Teratoscincus* *Strauch*, 1863 (Squamata: Sphaerodactylidae), from southeastern Iran. *Zool. Middle East*. **63**, 296-302 (2017).
- Ahmadzadeh, F. *et al.* Cryptic speciation patterns in Iranian rock lizards uncovered by integrative taxonomy. *PLoS ONE*. **8**, e80563 (2013).
- Ahmadzadeh, F., Flecks, M., Torki, F. & Böhme, W. A new species of angular-toed gecko, genus *Cyrtopodion* (Squamata: Gekkonidae), from southern Iran. *Zootaxa*. **2924**, 22-32 (2011).
- Anderson, S. C. *The Lizards of Iran*. (Society for the Study of Amphibians and Reptiles, New York, 1999).
- Anderson, SC. A new species of *Bunopus* (Reptilia: Gekkonidae) from Iran and a key to lizards of the genus *Bunopus*. *Herpetologica* **29**, 355–358 (1973).
- Auer, M., Richter, S. & Khani, A. A new record of the Turkmenian fat-tailed gecko, *Eublepharis turcmenicus* Darevsky, 1978, from north-eastern Iran (Squamata: Gekkonidae). *Zool. Middle East*. **45**, 107-109 (2008).
- Bahmani, Z., Rastegar-Pouyani, N. & Gharezi, A. A new record of *Eremias montanus* Rastegar-Pouyani & Rastegar-Pouyani, 2001 (Sauria: Lacertidae) from Kurdistan Province, Western Iran. *Amphib. reptile conserv.* **5**, 11-14 (2011).
- Bahmani, Z., Rastegar-Pouyani, E. & Rastegar-Pouyani N. The phylogenetic relationships and molecular systematics of scincid lizards of the genus *Heremites* (Sauria, Scincidae) in the Middle East based on mtDNA sequences. *Mitochondrial DNA Part A* **29**, 846-855 (2018).
- Dakhteh, S.M.H., Kami, H.G. & Anderson, S.C. *Stenodactylus khobarensis* (Haas, 1957): an addition to the Iranian herpetofauna (Reptilia: Squamata: Gekkonidae). *Russ. J. Herpetol.* **14**, 229–231 (2007).
- Eskandarzadeh, N. *et al.* Annotated checklist of the endemic Tetrapoda species of Iran. *Zoosystema*. **40**, 507-537 (2018).
- Fahimi, H., Papenfuss, T.J. & Anderson, S.C. Geographic distribution: Iran, Khuzestan province: *Scincus mitranus*. *Herpetol. Rev.* **40**: 454 (2009).
- Faizi, H. & Rastegar-Pouyani, N. Intra- and-inter-specific geographic variation in the Iranian Scincid lizards of the genus *Trachylepis* Fitzinger 1843 (Sauria: Scincidae). *Ira. J. Anim. Biosys.* **2**, 1–11 (2006).
- Faizi, H., Rastegar-Pouyani, N. & Yarani, R. On the occurrence of ectoparasite ticks on *Trachylepis* and *Eumeces* (Reptilia: Scincidae) in Iran. *Amphib. reptile conserv.* **5**, 7-10 (2011).

- Faizi, H. *et al.* A new species of *Eumeces* Wiegmann 1834 (Sauria: Scincidae) from Iran. *Zootaxa*. **4320**, 289-304 (2017).
- Farhadi Qomi, M., Kami, H. G., Shajii, H. & Kazemi, S. M. Further records of the plateau snake shink *Ophiomorus nuchalis* Nilson and Andren, 1978 (Sauria: Scincidae) from Isfahan province, Iran. *J. Anim. Biosys.* **7**, 171-175 (2011).
- Fathinia, B. & Rastegar-Pouyani, N. Sexual dimorphism in *Trapelus ruderatus ruderatus* (Sauria: Agamidae) with notes on the natural history. *Amphib. reptile conserv.* **5**, 15-22 (2011).
- Fathinia, B., Gholamifard, A. & Rastegar-Pouyani, N. First record of *Stenodactylus arabicus* (Haas, 1957) from Iran. *Herpetozoa*. **26**, 169-173 (2014).
- Fathinia, B., Karamiani, R., Darvishnia, H., Heidari, N. & Rastegar-Pouyani, N. A new species of *Carinatogekko* (Sauria: Gekkonidae) from Ilam Province, western Iran. *Amphib. Reptile Conserv.* **5**, 61-74 (2011).
- Fathinia, B. & Rastegar-Pouyani, N. Sexual dimorphism in *Trapelus ruderatus ruderatus* (Sauria: Agamidae) with notes on the natural history. *Amphib. Reptile Conserv.* **5**, 15-22 (2011).
- Fathinia, B., Rastegar-Pouyani, N., Sampour, M., Bahrami, A. M. & Jaafari, G. The lizard fauna of the Ilam province, southwestern Iran. *Iran. J. Anim. Biosyst.* **5**, 65-79 (2009).
- Gholamifard, A. & Rastegar-Pouyani, N. Distribution of *Hemidactylus* geckos (Reptilia: Gekkonidae) in Fars Province, Southern Iran. *Amphib. Reptile Conserv.* **5**, 1-6 (2011).
- Heidari, N., Faizi, H., Rastegar-Pouyani, N. & Rastegar-Pouyani, E. A New Record of *Acanthodactylus cantoris* (Sauria: Lacertidae) and its comparison with closely related *A. blanfordi* in Southeastern Iran. *Asian Herpetol. Res.* **3**, 79-82 (2012).
- Gholamifard, A., Rastegar-Pouyani, N. & Esmaili, H.R. Annotated checklist of reptiles of Fars Province, southern Iran. *Iran. J. Anim. Biosyst.* **8**, 155-167 (2012).
- Gholamifard, A. & Rastegar-Pouyani, N. *Microgekko helenae helenae* Nikolsky, 1907 (Sauria: Gekkonidae) extends its range to the southern Zagros Mountains, south of Iran. *Russ. J. Herpetol.* **22**, 1-10 (2015).
- Gholamifard, A., Rastegar-Pouyani, N. & Rastegar-Pouyani, E. Rediscovery of *Microgekko helenae fasciatus* (Schmidtler and Schmidtler, 1972) from Kermanshah Province, Western Iran with notes on taxonomy, morphology, and habitat. *Asian Herpetol. Res.* **6**, 339–346 (2015).
- Gholamifard, A. & Rastegar-Pouyani, N. First record and range extension of Sistan racerunner, *Eremias fasciata*, Blanford 1874, (Sauria: Lacertidae) from Hormozgan Province, southern Iran. *Amphib. Reptile Conserv.* **9**, 54–57 (2015).

- Gholamifard, A., Rastegar-Pouyani, N. & Rastegar-Pouyani, E. Rediscovery of *Microgecko helenae fasciatus* (Schmidtler and Schmidtler, 1972) from Kermanshah Province, Western Iran with notes on taxonomy, morphology, and habitat. *Asian Herpetol. Res.* **6**, 339-346 (2015).
- Gholamifard, A. *et al.* A new species of the genus *Microgecko* Nikolsky, 1907 (Sauria: Gekkonidae) from southern Iran. *Zootaxa* **4093**: 026-040 (2016).
- Gholamifard, A., Rastegar-Pouyani, N. & Rastegar-Pouyani, E. A new species of the genus *Microgecko* Nikolsky, 1907 (Sauria: Gekkonidae) from the southern Zagros Mountains, Iran. *Zootaxa* **4648**, 435–454 (2019).
- Damadi, E, Gholamifard, A. & Rastegar-Pouyani, N. Additional records for *Ophiomorus brevipes* (Blanford, 1874) and *O. tridactylus* from Sistan and Baluchestan Province, Southeastern Iran. *Ira. J. Anim. Biosys.* **11**, 173-178 (2015).
- Heidari, N., Rastegar-Pouyani, N., Rastegar-Pouyani, E., & Rajabizadeh, M. A new species of *Acanthodactylus Fitzinger* 1834 (Sauria: Lacertidae) from southern Iran. *Zootaxa* **3722**: 333-346 (2013).
- Hosseinian Yousefkhani, S.S, Yousefi, M., Khani, A. & Rastegar Pouyani, E. Some remarks on the distribution and habitat preferences of the *Eremias strauchi kopetdaghica* Szczerbak, 1972 (Sauria: Lacertidae) from the northeastern Iranian Plateau. *Herpetol. Notes.* **6**, 97-99 (2013).
- Hosseinian Yousefkhani, S.S. *et al.* Environmental suitability and distribution of the Caucasian Rock Agama, *Paralaudakia caucasia* (Sauria: Agamidae) in Western and Central Asia. *Asian Herpetol. Res.* **4**, 207-213 (2013).
- Hosseinian Yousefkhani, S.S., Yousefi, M., Rastegar-Pouyani, E. & Rastegar-Pouyani, N. Lizards from Qeshm Island, Iran. *Herpetol. Rev.* **44**, 486-488 (2013).
- Hosseinian Yousefkhani, S.S., Rastegar-Pouyani, E. & Rastegar-Pouyani, N. Geographic variation in *Mesalina watsonana* (Sauria: Lacertidae) along a latitudinal cline on the Iranian Plateau. *Salamandra.* **49**, 171-176 (2013).
- Hosseiian Yousefkhani, SS. *et al.* Description of a new species of the genus *Agamura* Blanford, 1874 (Squamata: Gekkonidae) from southern Iran. *Zootaxa* **4457**, 325–331 (2018).
- Hosseinzadeh, M. S., Farhadi Qomi, M. & Kazemi, S. M. Distribution of *Ophiomorus nuchalis* Nilson & Andrén, 1978: Current status of knowledge. *Herpetozoa.* **29**, 92-95 (2016).
- Kamali, A., & Anderson S. C. A. New Iranian *Phrynocephalus* (Reptilia: Squamata: Agamidae) from the hottest place on earth and a key to the genus *Phrynocephalus* in southwestern Asia and Arabia. *Zootaxa.* **3904**, 249-260 (2015).
- Kamali, K. & Dakhteh, M. *Tropicolotes steudneri* (Steudner's dwarf gecko). *Herpetol. Rev.* **37**, 241-242 (2006).

- Kamali, K. & Mozaffari, O. New data on the distribution of thick-tailed tuberculate gecko, *Bunopus crassicauda* (Sauria: Gekkonidae) in Iran. *Herpetol. Notes*. **6**, 281-283 (2013).
- Kamali, K. Geographic distributoin: *Acanthodactylus micropholis* (Persian Fringe-toed Lizard). *Herpetol. Rev.* **44**, 272-273 (2013).
- Kamali, K. Geographic distribution: *Mesalina brevirostris* (Blanford's Short-nosed Desert Lizard). *Herpetol. Rev.* **44**, 274 (2013).
- Karamiani, R. & Rastegar-Pouyani, N. New specimens of *Eublepharis angramainyu* Anderson & Leviton, 1966 (Sauria: Eublepharidae), from south-western regions of the Iranian Plateau. *Hamadryad.* **35**, 116-121 (2010).
- Karamiani, R. & Rastegar-Pouyani, N. A new record of the keel-scaled geko, *Carinatogekko aspratilis* (Anderson, 1973) (Sauria: Gekkonidae) from western Iran. *Herpetol. Rev.* **4**, 337-339 (2011).
- Karamiani, R. & Rastegar-Pouyani, N. Westernmost record of Khuzestan dwarf gecko *Tropiocolotes helenae helenae* (Nikolsky, 1907) (Sauria: Gekkonidae) from Kermanshah Province, western Iran. *Russ. J. Herpetol.* **19**, 212-216 (2012).
- Karamiani, R., Gholamifard, A. & Rastegar-Pouyani, N. Additional specimens and further data on Bakhtiari dwarf gecko, *Tropiocolotes persicus bakhtiari* Minton, Anderson et Anderson, 1970 from southwestern Iran. *Russ. J. Herpetol.* **20**, 271-275 (2013).
- Karamiani, R., Rastegar-Pouyani, N., Rastegar-Pouyani, E., Mamaghani Shishvani, M. & Nilson, G. First record of *Ablepharus chernovi* DAREVSKY, 1953, from Iran. *Herpetozoa* **31**, 94-97 (2018).
- Kazemi, S. M., Farhadi Qomi, M., Kami, H. G. & Anderson, S. C. A new species of *Ophiomorus* (Squamata: Scincidae) from Maranjab Desert, Isfahan Province, Iran, with a revised key to the genus. *Amphib. Reptile Conserv.* **5**, 23-33 (2011).
- Khani, A. *et al.* New record of the gecko *Crossobamon eversmanni* (Boulenger, 1887) from Parvand Protected Area, Khorasan Razavi province, in eastern Iran. *Herpetol. Notes.* **6**, 101-102 (2013).
- Krause, V., Ahmadzadeh, F., Moazeni, M., Wagner, P. & Wilms, T.M. A new species of the genus *Tropiocolotes* Peters, 1880 from western Iran (Squamata: Sauria: Gekkonidae). *Zootaxa* **3716**, 22–038 (2013).
- Mozaffari, O., Ahmadzadeh, F., Saberi-Pirooz, R. Fahimi's racerunner, a new species of the genus *Eremias* Fitzinger, 1834 (Sauria: Lacertidae) from Iran. *Zootaxa* **4768**, 565-578 (2020).

- Mahroo, B.S., Ghaffari, H., Panah, A.S., Fahimi, H., Naderi, A. & Bromand, S. New geographic distribution records of Zarudny's bent-toed gecko, *Mediodactylus russowii* zarudnyi Nikolsky, 1899 (Sauria: Gekkonidae) from Iran. *Russ. J. Herpetol.* **20**, 73-78 (2013).
- Mobaraki, A., Kami, H. G., Abtin, E. & Dehgannejhad, M. New records of Indian Garden Lizard, *Calotes versicolor* (Daudin, 1802) from Iran (Sauria: Agamidae). *Iranian Iran. J. Anim. Biosyst.* **9**, 147-152 (2013).
- Moradi, N. & Shafiei, S. New record of the Western leopard gecko, *Eublepharis angramainyu* Anderson & Leviton, 1966 (Sauria: Eublepharidae) from southeastern Iran. *Amphib. Reptile Conserv.* **5**, 88-91 (2011).
- Moradi, N., Shafiei, S., Fahimi, H., & Bromand, S. Additional information on Misonne's swollen-nose gecko, *Rhinogecko misonnei* de Witte, 1973 (Squamata, Geckonidae) in Iran. *Amphib. Reptile Conserv.* **5**, 54-60 (2011).
- Mozaffari, O. Geographic distribution: *Acanthodactylus cantoris*. *Herpetol. Rev.* **41**, 510-511 (2010).
- Mozaffari, O., Ahmadzadeh, F., & Parham, J. F. *Eremias papenfussi* sp. nov., a new lacertid lizard (Sauria: Lacertidae) from Tehran Province, Iran. *Zootaxa.* **3114**: 57-62 (2011).
- Mozaffari, O., Ghaffari, H., Kamali, K., & Safaei, B. New record of the plateau snake skink, *Ophiomorus nuchalis* (Squamata: Scincidae), from Iran. *Russ. J. Herpetol.* **18**, 36-38 (2011).
- Mozaffari, O., & Parham, J. F. A new species of racerunner lizard (Lacertidae: *Eremias*) from Iran. *Proc. Calif. Acad. Sci.* **58**, 569-574 (2007).
- Mozafari, O., Kamali, K., & Fahimi, H. The atlas of reptiles of Iran. Jahad Daneshgahi, Kharazmi, Karaj, Iran (2016).
- Nazari-Serenjeh, F. & Torki, F. Additional specimens of the gecko *Asaccus nasrullahi* Werner, 2006 (Reptilia: Phyllodactylidae), with notes on taxonomy and ecology. *Zool. Middle East.* **44**, 57-66 (2008).
- Nazarov, R. A., & Rajabizadeh, M. A new species of angular-toed gecko of the genus *Cyrtopodion* (Squamata: Sauria: Gekkonidae) from south-east Iran (Sistan- Baluchistan Province). *Russ. J. Herpetol.* **14**, 137-144 (2007).
- Nazarov, R., Ananjeva, N. & Radjabizadeh, M. Two new species of angular-toed geckoes (Squamata: Gekkonidae) from south Iran. *Russ. J. Herpetol.* **16**, 311-324 (2009).
- Nazarov, R., Rajabizadeh, M., Heidari, N. & Faizi, H. Geographic distribution: *Acanthodactylus boskianus* (Bosc's Fringe-toed Lizard). *Herpetol. Rev.* **42**, 567 (2011).

- Nazarov, R. A. & Rajabizadeh, M. A new species of angular-toed gecko of the genus *Cyrtopodion* (Squamata: Sauria: Gekkonidae) from south-east Iran (Sistan-Baluchistan province). *Russ. J. Herpetol.* **14**, 137-144 (2007).
- Nazarov, R. A. The new record of spiny-tailed thin-toed gecko *Mediodactylus spinicauda* (Strauch, 1887), (Reptilia, Gekkonidae) in East Iran. *Russ. J. Herpetol.* **12**, 124 (2005).
- Nazarov, R. A., Bondarenko, D. A. & Radjabizadeh, M. A new species of thin-toed geckos *Cyrtopodion sensu lato* (Squamata: Sauria: Gekkonidae) from Hormozgan province, south Iran. *Russ. J. Herpetol.* **19**, 292-298 (2012).
- Nazarov, R. A. *et al.* A New Species of Frog-Eyed Gecko, Genus *Teratoscincus* Strauch, 1863 (Squamata: Sauria: Sphaerodactylidae), from Central Iran. *Russ. J. Herpetol.* **24**, 291-310 (2017).
- Nazarov, RA., Melnikov, DA., Rajabizadeh, M. & Poyarkov, NA. A new species of short-fingered geckos *Stenodactylus* (Squamata, Geckonidae) from South Iran with taxonomic notes on validity of the genus *Trigonodactylus* Hass, 1957. *Zootaxa* **4457**, 093–113 (2018).
- Nilson, G. & Andrén, C. A new species of *Ophiomorus* (Sauria: Scincidae) from Kavir Desert, Iran. *Copeia* **4**, 559-564 (1978).
- Nilson, G., Rastegar-Pouyani, N., Rastegar-Pouyani, E. & Andrén, C. Lacertas of South and Central Zagros Mountains, Iran, with descriptions of two new taxa. *Russ J. Herpetol.* **10**, 11–24 (2003).
- Oraie, H., Rahimian, H., Rastegar-Pouyani, N., Rastegar-Pouyani, E. & Khosravani, A. The easternmost record of *Ophisops elegans* (Sauria: Lacertidae) in Iran. *Herpetol. Notes* **5**, 469-470 (2012).
- Parsa, H., Oraie, H., Khosravani, A. & Rastegar-Pouyani, N. Systematics and distribution of the Iranian Plateau leaf-toed geckos of the genus *Asaccus* (Sauria: Gekkonidae). *Iran. J. Anim. Biosyst.* **5**, 43-55 (2009).
- Rajabizadeh, M., Faizi, H., Anderson, S. C., Zarrintab, M. & Nazarov, R. Taxonomic status of *Tropiocolotes* cf. *stuedneri* with a description of a new species of *Tropiocolotes* (Reptilia: Squamata: Gekkonidae) in southern Iran. *Zootaxa.* **4388**, 283- 291 (2018).
- Rajabizadeh, M., Nilson, G. & Kami, H. G. A new species of mountain viper (Ophidia: Viperidae) from the Central Zagros Mountains, Iran. *Russ. J. Herpetol.* **18**, 235-240 (2011).
- Rajabizadeh, M. *et al.* New records of lacertid genera, *Iranolacerta* and *Apathya* (Sauria: Lacertidae) in Iran. *Iran. J. Anim. Biosyst.* **6**, 21-32 (2010).
- Rajabizadeh, M., Ghasemi, M., Faizi, H., & Rastegar-Pouyani, N. New data on *tropiocolotes* cf. *Stuedneri* (Peters, 1869), (Sauria: Gekkonidae) in southern Iran. *Russ. 1827* (Reptilia: Squamata: Gekkonidae). *Sauria* **33**, 47-56 (2010).

- Rajabizadeh, M., Rastegar-Pouyani, N., Faizi, H. & Bostanchi, H. New insights in the taxonomy of the Persian Sand Gecko *Tropiocolotes persicus* (Nikolsky, 1903) (Sauria: Gekkonidae). *Zool. Middle East* **49**, 55–62 (2010).
- Rajabizadeh, M. & Rastegar-Pouyani, N. Two new records of reptiles (Reptilia: Squamata) from southeastern Iran. *Turk. J. Zool.* **33**, 103-104 (2009).
- Rastegar-Pouyani, E., Avci, A., Kumlutas, Y., Ilgaz, Ç. & Hosseinian Yousefkhani, S. S. New country record and range extension of *Eremias suphani* Başoğlu & Hellmich, 1968 from Iran. *Amphib. Reptile Conserv.* **6**, 35-39 (2013).
- Rastegar-Pouyani, E., Rastegar-Pouyani, N., Hosseinian Yousefkhani, S. S. & Arab, M. Rediscovery of *Darevskia steineri* (Eiselt, 1995) (Sauria: Lacertidae) from Iran. *Russ. J. Herpetol.* **20**, 1-3 (2013).
- Rastegar-Pouyani, E. *et al.* A new species of the genus *Eremias* Fitzinger, 1834 (Squamata: Lacertidae) from Central Iran, supported by mtDNA sequences and morphology. *Zootaxa* **4132**, 207-220 (2016).
- Rastegar-Pouyani, N. A new species of *Asaccus* from the Zagros Mountains, Kermenshahan province, Western Iran. *Russ. J. Herpetol.* **3**, 11–17 (1996).
- Rastegar-Pouyani, N. & Nilson, G. A new species of *Eremias* from Fars province, south-Central Iran. *Russ. J. Herpetol.* **4**, 94-101 (1997).
- Rastegar-Pouyani, N. & Nilson, G. A new species of *Lacerta* from the Zagros Mountains, Esfahan province, west-central Iran. *Proc. Calif. Acad. Sci.* **50**, 267-277 (1998).
- Rastegar-Pouyani, N. (1998) A new species of *Acanthodactylus* (Sauria: Lacertidae) from Qasr-e-Shirin, Kermanshah Province, Western Iran. *Proc. Calif. Acad. Sci.* **50**, 257–265.
- Rastegar-Pouyani, N. First record of the lacertid *Acanthodactylus boskianus* (Sauria: Lacertidae) for Iran. *Asiat. Herpetol. Res.* **8**, 85-89 (1999).
- Rastegar-Pouyani, N. Two new subspecies of *Trapelus agilis* Complex (Sauria: Agamidae) From Lowland Southwestern Iran and Southeastern Pakistan. *Asiat. Herpetol. Res.* **8**, 90-101(1999).
- Rastegar-Pouyani, N. & Rastegar-Pouyani, E. A new species of *Eremias* (Sauria: Lacertidae) from highlands of Kermanshah Province, western Iran. *Asiat. Herpetol. Res.* **9**, 107-112 (2001).
- Rastegar-Pouyani, N. & Rastegar-Pouyani, E. A new form of *Eremias* (Sauria: Lacertidae) from the Alvand Mountains, Hamedan Province, Western Iran. *Iran. J. Anim. Biosyst.* **1**, 14-20 (2005).
- Rastegar-Pouyani, N., Nilson, G. & Faizi, H. A new species of *Asaccus* (Sauria: Gekkonidae) from Kurdistan province, western Iran. *Hamadryad.* **30**, 141-150 (2006).

Rastegar-Pouyani, N., Rastegar-Pouyani, E. & Jawaheri, M. *Field guide to the reptiles of Iran*. (Razi University Press, Razi, 2007).

Rastegar-Pouyani, N., Oraei, H. & Johari, M. New records of the gekkonid lizard, *Cyrtopodion heterocercum heterocercum* (Sauria: Gekkonidae) from Isfahan Province, Central Iran, with an extended description and notes on distribution. *Russ. J. Herpetol.* **16**, 220-228 (2009).

Rastegar-Pouyani, N., Oraei, H. & Johari, M. A new record of the gekkonid lizard *Tropicolotes latifi* Leviton & Anderson, 1972 from Iran (Sauria: Gekkonidae). *Zool. Middle East.* **47**, 105-107 (2009).

Rastegar-Pouyani, N., Khosravani, A. & Oraie, H. A new record of *Cyrtopodion scabrum* (Heyden, 1827) from the Caspian Sea coastal region, Guilan Province, northern Iran. *Herpetol. Notes.* **3**, 61-63 (2010).

Rastegar-Pouyani, N., Karamiani, R., Oraei, H., Khosrawani, A. & Rastegar-Pouyani, E. A new subspecies of *Darevskia raddei* (Boettger, 1892) (Sauria: Lacertidae) from the West Azerbaijan Province, Iran. *Asian Herpetol. Res.* **2**, 216-222 (2011).

Safaei, B. et al. New geographic distribution records of zarudny's bent-toed gecko, *Mediodactylus russowii zarudnyi* Nikolsky, (1899) (Sauria: Gekkonidae) from Iran. *Russ. J. Herpetol.* **201**, 73 – 78 (2012).

Safaei-Mahroo, B. et al. The herpetofauna of Iran: checklist of taxonomy, distribution and conservation status. *Asian Herpetol. Res.* **6**, 257-290 (2015).

Safaei-Mahroo, B. et al. A new genus and species of gekkonid lizard (Squamata: Gekkota: Gekkonidae) from Hormozgan Province with a revised key to gekkonid genera of Iran. *Zootaxa* **4109**: 428-444 (2016).

Sami, S., Safaei-Mahroo, B. & Ghaffari, H. Range extensions of three endemic snake-skinks (Scincidae: *Ophiomorus*) in Iran. *Russ. J. Herpetol.* **24**, 329 – 332 (2017).

Shafiei, S., Sehthasabet, M.E. & Moradi, N. New record of Sandfish Skink, *Scincus scincus conirostris* Blanford, 1881 (Sauria: Scincidae) from southeastern Iran. *Check List* **11**, 1774 (2015).

Šmíd J., et al. Annotated checklist and distribution of the lizards of Iran. *Zootaxa* **3855**: 1-97 (2014).

Šmíd, J. & Frynta, D. Genetic variability of *Mesalina watsonana* (Reptilia: Lacertidae) on the Iranian plateau and its phylogenetic and biogeographic affinities as inferred from mtDNA sequences. *Acta Herpetol.* **7**, 139-153 (2012).

Torki, F. Sexual dimorphism in the Banded Dwarf Gecko, *Tropicolotes helenae fasciatus* (Gekkonidae) on the western Iranian Plateau. *Zool. Middle East.* **40**, 33–38 (2007).



Torki, F. et al. Geckos of the genera *Tropicolotes* and *Asaccus* in the Zagros Mountains, Iran. *Gekko* **5**, 31–43 (2008).

Torki, F. Sexual dimorphism of scale keeling in *Asaccus kurdistanensis* Rastegar-Pouyani, Nilson & Faizi 2006. *Herpetozoa* **22**, 79-82 (2009).

Torki, F. Distribution, lifestyle, and behavioral aspects of the Iranian Fat-tailed Gecko, *Eublepharis angramainyu* Anderson and Leviton, 1966. *Gekko* **6**, 17-22 (2010).

Torki, F. Notes on sexual size dimorphism in the Iranian Short-fingered Gecko *Stenodactylus affinis* (Reptilia, Gekkonidae). *Herpetol. Bull.* **113**, 30-33 (2010).

Torki, F. Description of a new species of *Carinatogekko* (Squamata: Gekkonidae) from Iran. *Salamandra* **47**, 103-111 (2011).

Torki, F., Ahmadzadeh, F., Ilgaz, Ç., Avcı, A. & Kumlutaş, Y. Description of four new *Asaccus* Dixon and Anderson, 1973 (Reptilia: Phyllodactylidae) from Iran and Turkey. *Amphib. Reptil.* **32**, 185-202 (2011).

Torki, F., Fathinia, B., Rostami, H. A. & Nazari-Serenjeh, F. Beschreibung eines neuen *Asaccus* (Sauria: Phyllodactylidae) aus dem Iran. *Sauria* **33**, 51-62 (2011).

Torki, F., Manthey, U. & Barts, M. A new *Hemidactylus* from Lorestan Province, western Iran, with notes on *Hemidactylus robustus* Heyden, 1827 (Reptilia: Squamata: Gekkonidae). *Sauria* **33**, 47-56 (2011).

Torki, F., Manthey, U., Barts, M. Ein neuer *Hemidactylus* Gray, 1825 aus der Provinz Lorestan, West- Iran, mit Anmerkungen zu *Hemidactylus robustus*. Heyden, 1827 (Reptilia: Squamata: Gekkonidae). *Sauria*, **33**, 47-56. (2011).

Yousefi, M., Khani, A., Eslahi, H. & Hosseinian Yousefkhani, S.S. Easternmost record of *Darevskia defilippii* (Camerano, 1877) from Qarchaq Protected Area, Kopet Dagh Mountains, northeastern Iran. Available from: [http:// www.lacerta.de/AS/Bibliografie/BIB\\_7401.pdf](http://www.lacerta.de/AS/Bibliografie/BIB_7401.pdf) (Accessed 25 April 2017) (2013).

Yousefi, M., Khani, A., Shaykhi Ilanloo, S. & Rastegar Pouyani, E. Lizard's fauna of the Sabzevar with particular emphasis on the syntopic lizard and presentation of a framework for reptile distribution of Iran. *Taxon. System.* **5**, 1-16 (2013).

Yousefi, M., Khani, A., Shaykhi Ilanloo, S., Kafash, A., & Rastegar Pouyani, E. Reptile fauna of the Khajeh protected area, with assessing its similarities with physiogeographical area of the Iranian Lizards. *Taxon. System.* **22**, 13-22 (2016).

Yousefi, M., Ataei, F., Kafash, A. & Rezaei, H. The lizard fauna of Alborz Province: distribution and conservation. *Exp. Anim. Biol.* **6**, 117-126 (2018).
